# Supplementary material for: Nitrogen-doped carbon nanotubes for sensitive and selective determination of heavy metals
Source: Royal Society of Chemistry journal article supplement (doi:10.1039/c5ra15944j), 2015-01-01
Supplement: c5ra15944j1.pdf [file c5ra15944j1.pdf]

### Supporting Information

## Nitrogen doped carbon nanotubes for sensitive and selective determination of heavy metals

Anju Joshi and Tharamani C. Nagaiah\*

### Physical Characterization

The morphology of the synthesized material (N-CNT 200, N-CNT 400, N-CNT 600 & O-CNT) was characterized using scanning electron microscope (SEM, JEOL, JSM-66101 V) which suggests tubular appearance of the synthesized N-CNT.

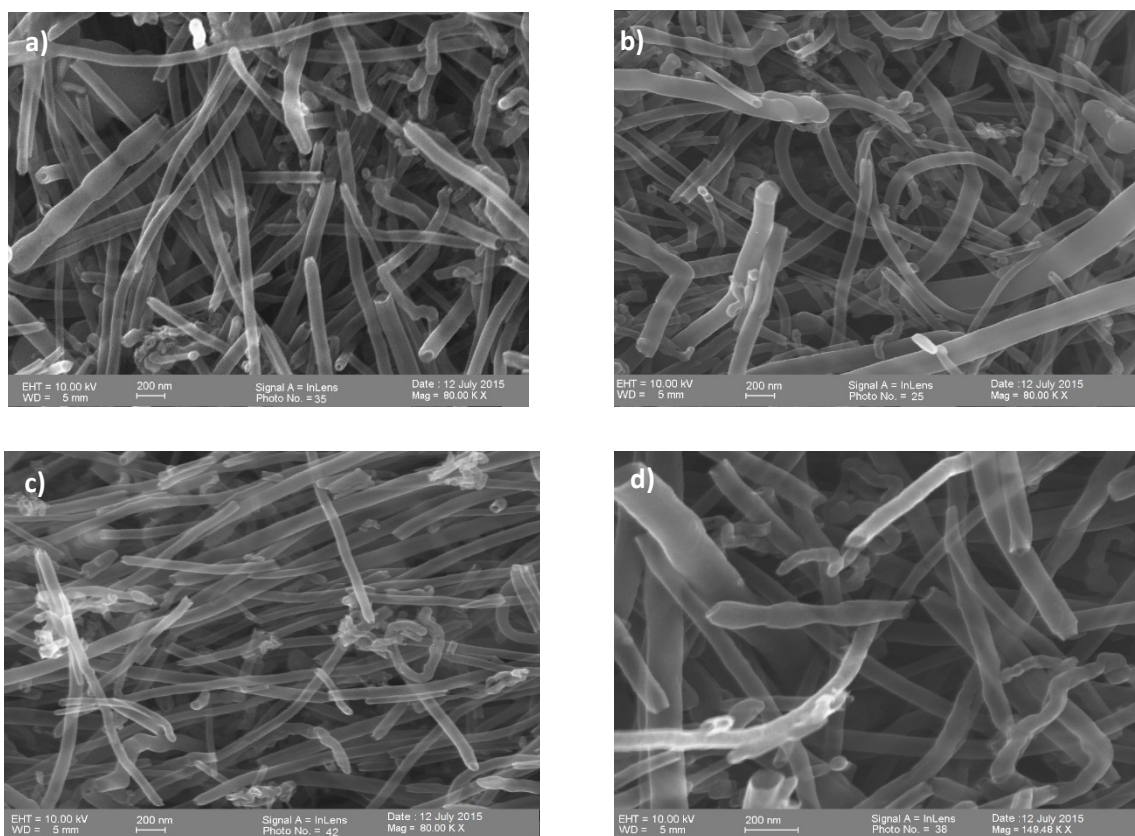

**Fig. S1** : Scanning electron microscope images of synthesized a) N-CNT 200 b) N-CNT 400 c) N-CNT 600 d) N-CNT 800.

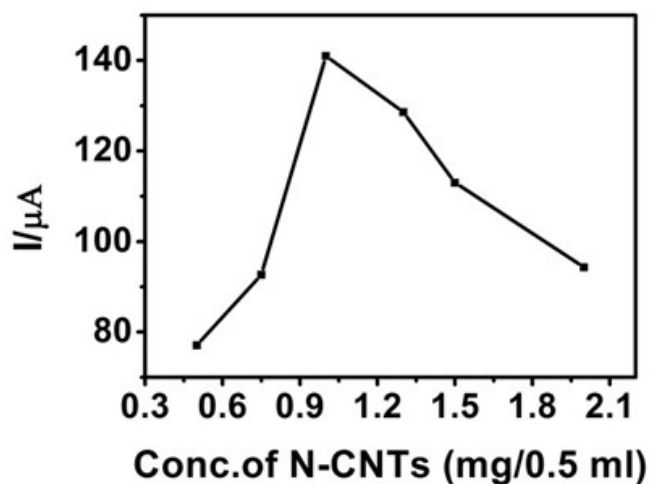

**Fig. S2:** Effect of concentration of the N-CNT 600 on the oxidation current in a solution containing 5  $\mu\text{M}$   $\text{Pb}(\text{NO}_3)_2$  in 0.05 M sulphuric acid (pH 4.0) at a frequency of 15 Hz, step potential 0.3 mV, pulse amplitude 25 mV, scan rate 4.5  $\text{mVs}^{-1}$ , CE: Pt wire, RE: Ag/AgCl/3M KCl

#### **Fabrication of Bi modified glassy carbon electrode (Bi/GCE)**

Bismuth modified GCE was fabricated using a previously reported literature.<sup>1</sup> Briefly, the solution were prepared by mixing tartaric acid (D+) and  $\text{HNO}_3$  to make sufficiently acidic solution with subsequent addition of  $\text{KNO}_3$  and glycerol (10 %) for proper dissolving of bismuth nitrate. Bismuth nanoparticles were deposited onto GCE using triple pulse voltage technique<sup>2</sup> employing Autolab potentiostat/galvanostat in a three electrode assembly. All potentials were referenced using Ag/AgCl/3M KCl. Deposition of metal particles was accomplished by step-edge oxidation at 0.18 V for 5 s. After that, the nucleation density at the step edges was increased by applying a very short (5 ms) nucleation pulse to initiate the nanoparticle growth. Thirdly, after this nucleation pulse is applied, subsequent growth is carried out at a potential of  $-0.075$  V for 50 sec.

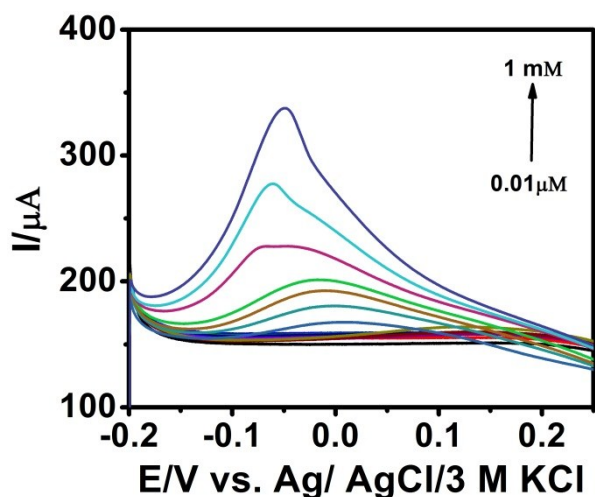

**Fig. S3:** Square wave voltammograms at N-CNT 600 modified GCE in 0.05 M H<sub>2</sub>SO<sub>4</sub> (pH 4.0) at various concentration of Cu metal ions ranging from 0.001 μM – 1 mM at a frequency of 15 Hz, step potential 0.3 mV, pulse amplitude 25 mV, scan rate 4.5 mVs<sup>-1</sup>, CE: Pt wire, RE: Ag/AgCl/3M KCl .

**Table S1: Surface composition of O-CNTs and N-CNTs derived from C H N analysis.**

| Sample    | C (%) | H(%) | N(%) |
|-----------|-------|------|------|
| O-CNT     | 80.6  | 19.4 | 0    |
| N-CNT 200 | 88.8  | 2.4  | 8.8  |
| N-CNT 400 | 89.9  | 1.9  | 8.2  |
| N-CNT 600 | 91.7  | 1.5  | 6.8  |
| N-CNT 800 | 94.6  | 0.9  | 4.5  |

**Table S2:** Analytical parameters for simultaneous determination of Pb metal ions in presence of Cd metal ions using various CNTs

| Sample    | Regression Equation | Linear Range ( $\mu\text{M}$ ) | $R^2$ | Sensitivity ( $\mu\text{A } \mu\text{M}^{-1} \text{cm}^{-2}$ ) |
|-----------|---------------------|--------------------------------|-------|----------------------------------------------------------------|
| N-CNT 200 | 1.70x+112.63        | 0.01-70                        | 0.98  | 24.062                                                         |
| N-CNT 400 | 5.57x+46.95         | 0.01-70                        | 0.98  | 78.83                                                          |
| N-CNT 600 | 8.35x+67.60         | 0.01-70                        | 0.98  | 118.18                                                         |
| O-CNT     | 3.34x+480.12        | 0.01-70                        | 0.97  | 47.27                                                          |

**Table S3:** Analytical parameters for simultaneous determination of Cd metal ions in presence of Pb metal ions using various CNTs

| Sample    | Regression Equation | Linear Range ( $\mu\text{M}$ ) | $R^2$ | Sensitivity ( $\mu\text{A } \mu\text{M}^{-1} \text{cm}^{-2}$ ) |
|-----------|---------------------|--------------------------------|-------|----------------------------------------------------------------|
| N-CNT 200 | 1.85x+23.47         | 0.1-100                        | 0.97  | 26.18                                                          |
| N-CNT 400 | 2.28x+42.08         | 0.1-100                        | 0.98  | 32.27                                                          |
| N-CNT 600 | 2.61x+71.48         | 0.1-100                        | 0.99  | 37.15                                                          |
| O-CNT     | 1.76x+39.70         | 0.1-100                        | 0.99  | 24.91                                                          |

**Table S4:** Surface composition of O-CNTs and N-CNTs derived from XPS experiments.<sup>3-4</sup>

| Sample    | C %  | O %  | N %                |     |     |      |      |
|-----------|------|------|--------------------|-----|-----|------|------|
|           |      |      | N <sub>total</sub> | N1  | N2  | N3   | N4   |
| OCNT      | 80.6 | 19.4 | 0                  | --  | --  | ---- | ---- |
| N-CNT 200 | 84.5 | 9.5  | 6.0                | 1.7 | 4.3 | ---- | ---- |
| N-CNT 400 | 89.5 | 4.8  | 5.7                | 3.5 | 1.8 | 0.4  | ---- |
| N-CNT 600 | 93.3 | 2.4  | 4.3                | 2.2 | 1.4 | 0.5  | 0.2  |
| N-CNT 800 | 95.5 | 1.6  | 2.9                | 1.2 | 0.8 | 0.7  | 0.2  |

**Table S5:** Analytical results of N-CNT 600 modified GCE towards determination of Pb and Cd metal ions from natural water resources (n=5)

| Sample | Analyte | Concentration<br>(Added )<br>μM | Concentration<br>(found )<br>μM | Recovery (%) |
|--------|---------|---------------------------------|---------------------------------|--------------|
|--------|---------|---------------------------------|---------------------------------|--------------|

|                          |    |   |     |     |
|--------------------------|----|---|-----|-----|
| Tap water<br>(IIT Ropar) | Cd | 5 | 4.8 | 96  |
|                          | Pb | 2 | 2.1 | 105 |

1. Groundwater parameters, H. Thejaswini and S. Sampath, *Bulletin of Materials Science*, 2008, **31**, 207-212.
2. E. C. Walter, M. P. Zach, F. Favier, B. J. Murray, K. Inazu, J. C. Hemminger and R. M. Penner, *ChemPhysChem*, 2003, **4**, 131-138.
3. T. C. Nagaiah, S. Kundu, M. Bron, M. Muhler and W. Schuhmann, *Electrochemistry Communications*, 2010, **12**, 338-341.
4. S. Kundu, W. Xia, W. Busser, M. Becker, D. A. Schmidt, M. Havenith and M. Muhler, *Physical Chemistry Chemical Physics*, 2010, **12**, 4351-4359.

## References:
